# Supplementary material for: Solvothermal vs. bench-top reactions: Control over the formation of discrete complexes and coordination polymers
Source: Royal Society of Chemistry journal article supplement (doi:10.1039/b707709b), 2007-01-01
Supplement: b707709b.pdf [file b707709b.pdf]

# Solvothermal versus Bench-top Reactions: Control Over the Formation of Discrete Complexes and Coordination Polymers

Anthony S.R. Chesman, David R. Turner, David J. Price, Boujemaa Moubaraki, Keith  
S. Murray, Glen B. Deacon and Stuart R. Batten \*

## Supplementary Information

X-ray powder diffraction experiments were performed on a Bruker D8 Focus diffractometer using the Diffrac Plus XRD Commander software. Scans were run at a rate of  $2^\circ \text{ min}^{-1}$  using a scan step size of  $0.01^\circ$ . Calculated patterns from single crystal data were made using the Lazy Pulverix interface of X-Seed.

A scan was run of a freshly prepared, finely ground sample of the bulk product from the reaction of  $\text{Cu}(\text{NO}_3)_2$  and  $\text{Na}(\text{dcm})$ , Figure S1. This shows significant peaks at low  $2\theta$  values corresponding to the calculated powder patterns of both **1** and **3** (the methanol and water solvates, respectively) being present. A minor peak at low theta is also observed that corresponds to the desolvated network **4**.

A second scan was run on the fresh sample immediately after the first (i.e. a time lag of approximately one hour since isolated of the product from the reaction mixture). This scan shows no peak corresponding to **1** with the major peaks being assignable to the water solvate **3**, Figure 2. The weaker signals of **4** are also still present.

The sample was then heated in an oven at  $75^\circ\text{C}$  for 16 hours (with a colour change from dark green to pale brown) and the XRPD re-collected. The peaks for **3** are significantly weaker and those for **4** dominate the pattern confirming that heating of **1** and **3** lead to transformation to **4**.

It should be noted that, from observation, single crystals of **1** lose crystallinity on prolonged removal from the mother liquor, effectively ruling out the possibility that the transitions that occur are crystal-to-crystal transformations.

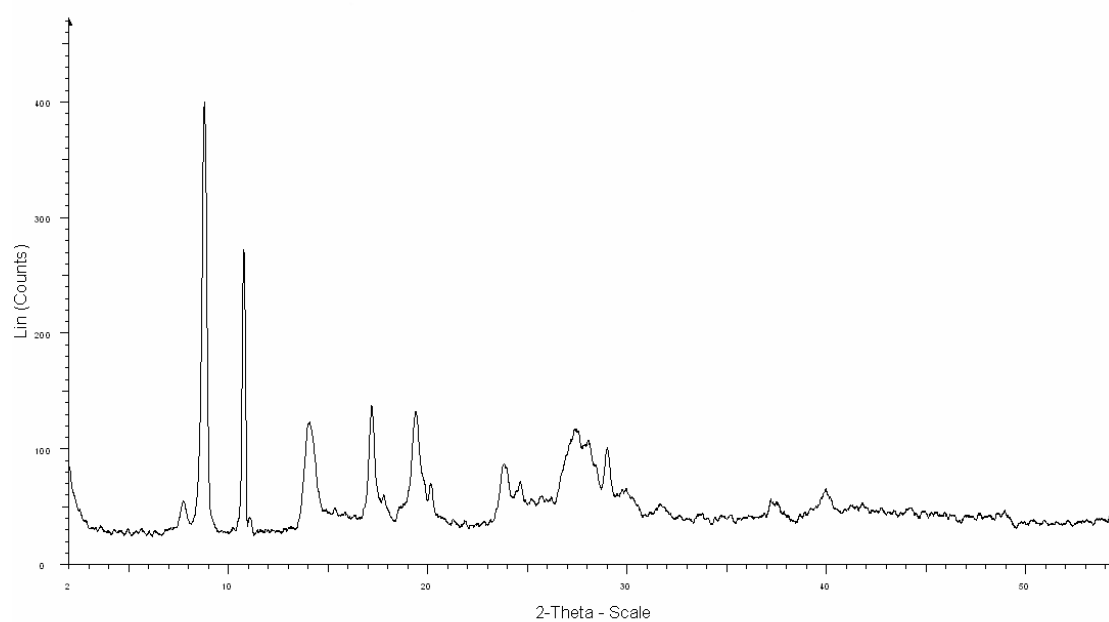

**Figure S1:** XRPD image of a fresh sample from the reaction of  $\text{Cu}(\text{NO}_3)_2$  with  $\text{Na}(\text{dcnm})$ . Peaks corresponding to both the methanol **1** and water **3** solvates at low  $2\theta$  are evident in addition to a small peak corresponding to the desolvated network **4**. Calculated patterns from single crystal data are shown in Figures S3 – S5.

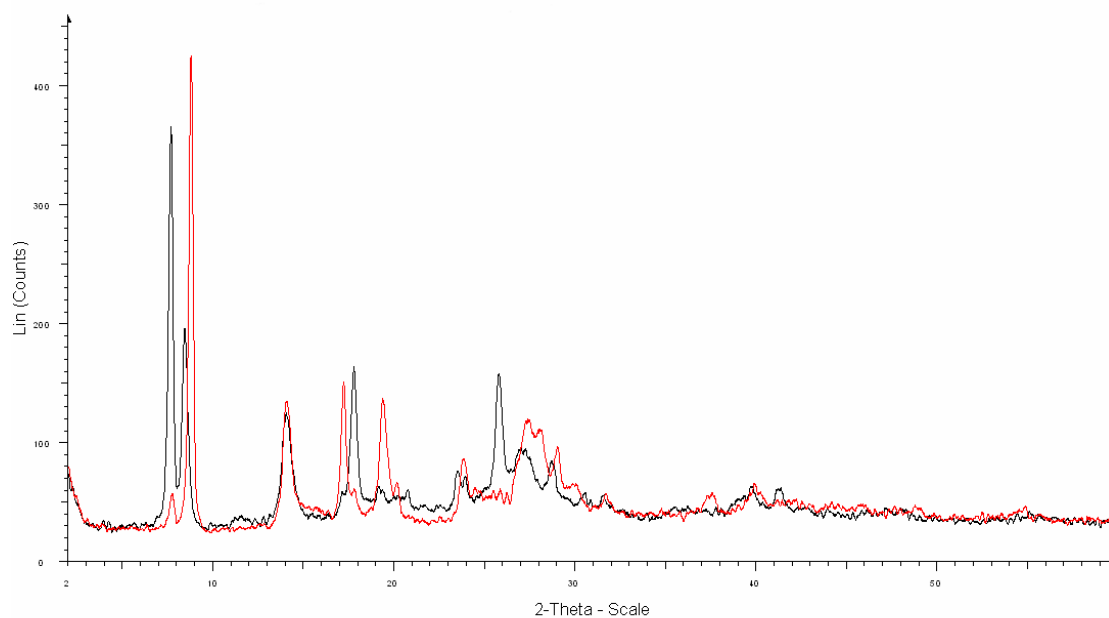

**Figure S2:** Overlaid powder patterns of the reaction mixture after standing for one hour (red) and after heating at  $75\text{ }^\circ\text{C}$  overnight (black). The peaks corresponding to **3** are strongest in the pre-heated sample (with those due to **1** being absent) whilst after heating the pattern of **4** is predominant, despite a significant residual amount of **3**. Calculated patterns from single crystal data are shown in Figures S3 – S5.

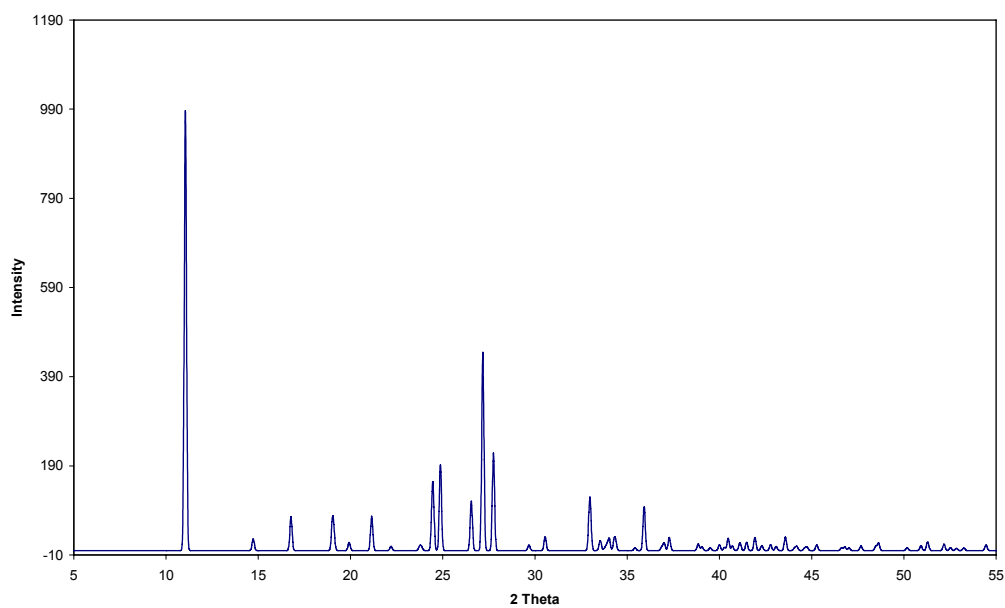

**Figure S3:** Generated XRPD plot of **1** from single crystal data.

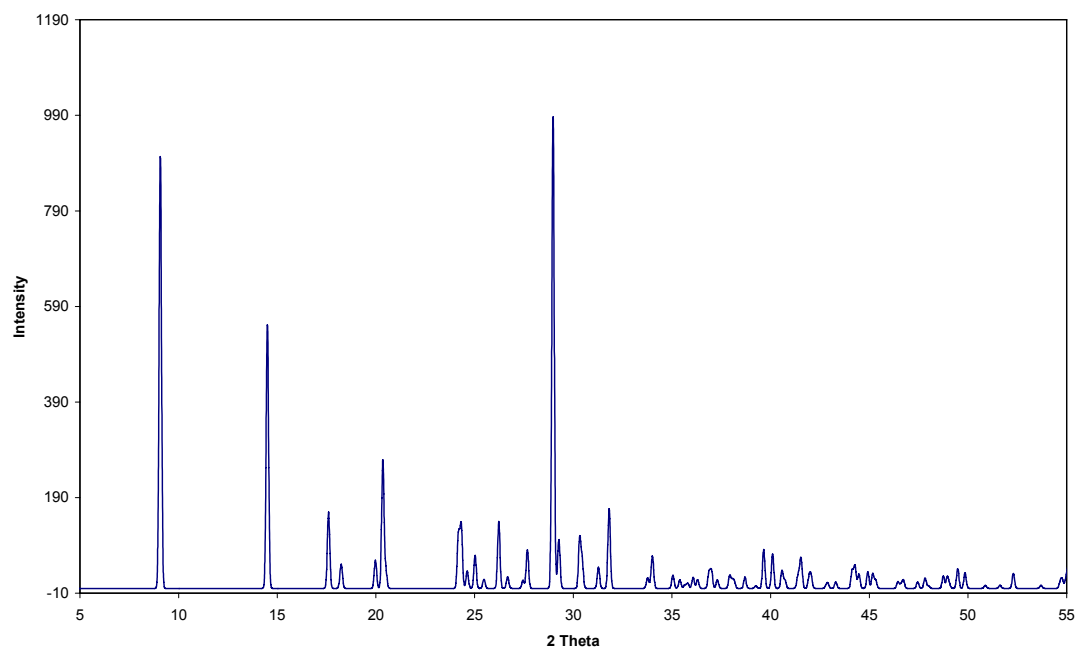

**Figure S4:** Generated XRPD plot of **3** from single crystal data.

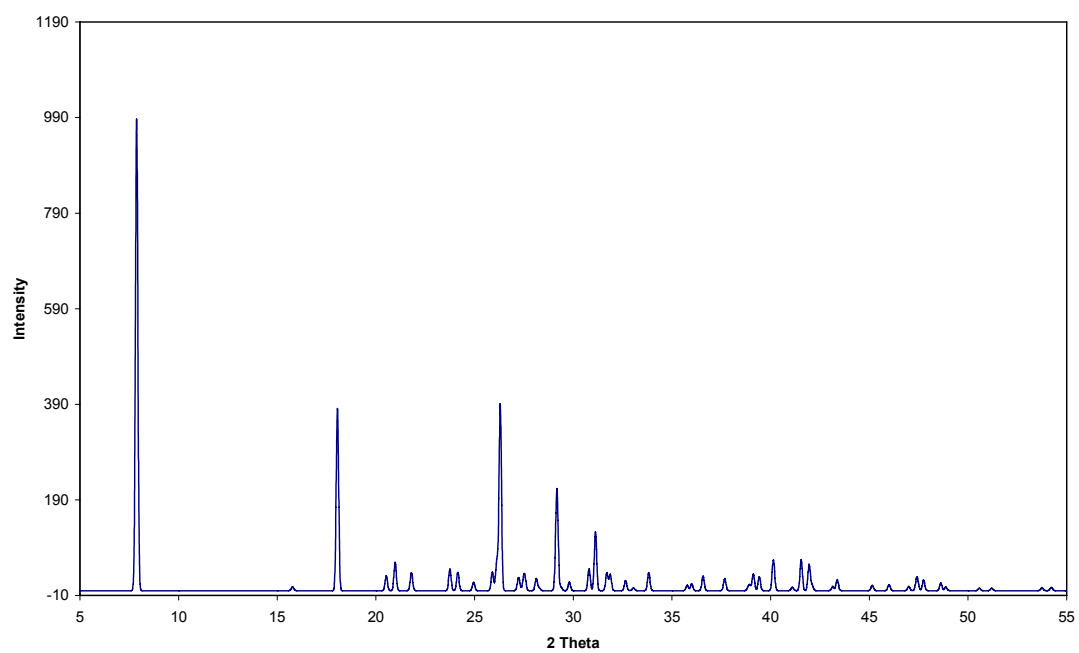

**Figure S5:** Generated XRPD plot of **4** from single crystal data.
